# Supplementary material for: The fate of organic species upon sintering of thiol-stabilised gold nanoparticles under different atmospheric conditions
Source: Royal Society of Chemistry journal article supplement (doi:10.1039/d2cp05822g), 2023-01-01
Supplement: d2cp05822g1.pdf [file d2cp05822g1.pdf]

## Supplementary Information

### The fate of organic species upon sintering of thiol-stabilised gold nanoparticles under different atmospheric conditions

Paige K. Summers, Alexander Angeloski, Richard Wuhrer, Michael B. Cortie, Andrew M. McDonagh

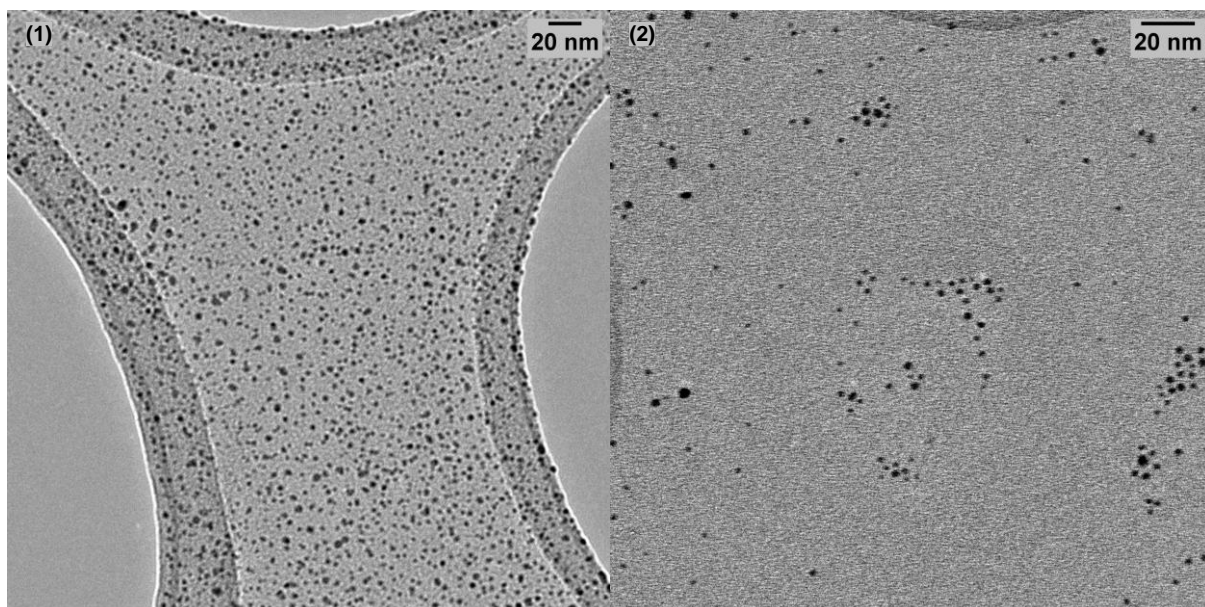

**Fig. S1.** TEM images of (1) BT@AuNP and (2) HDT@AuNP

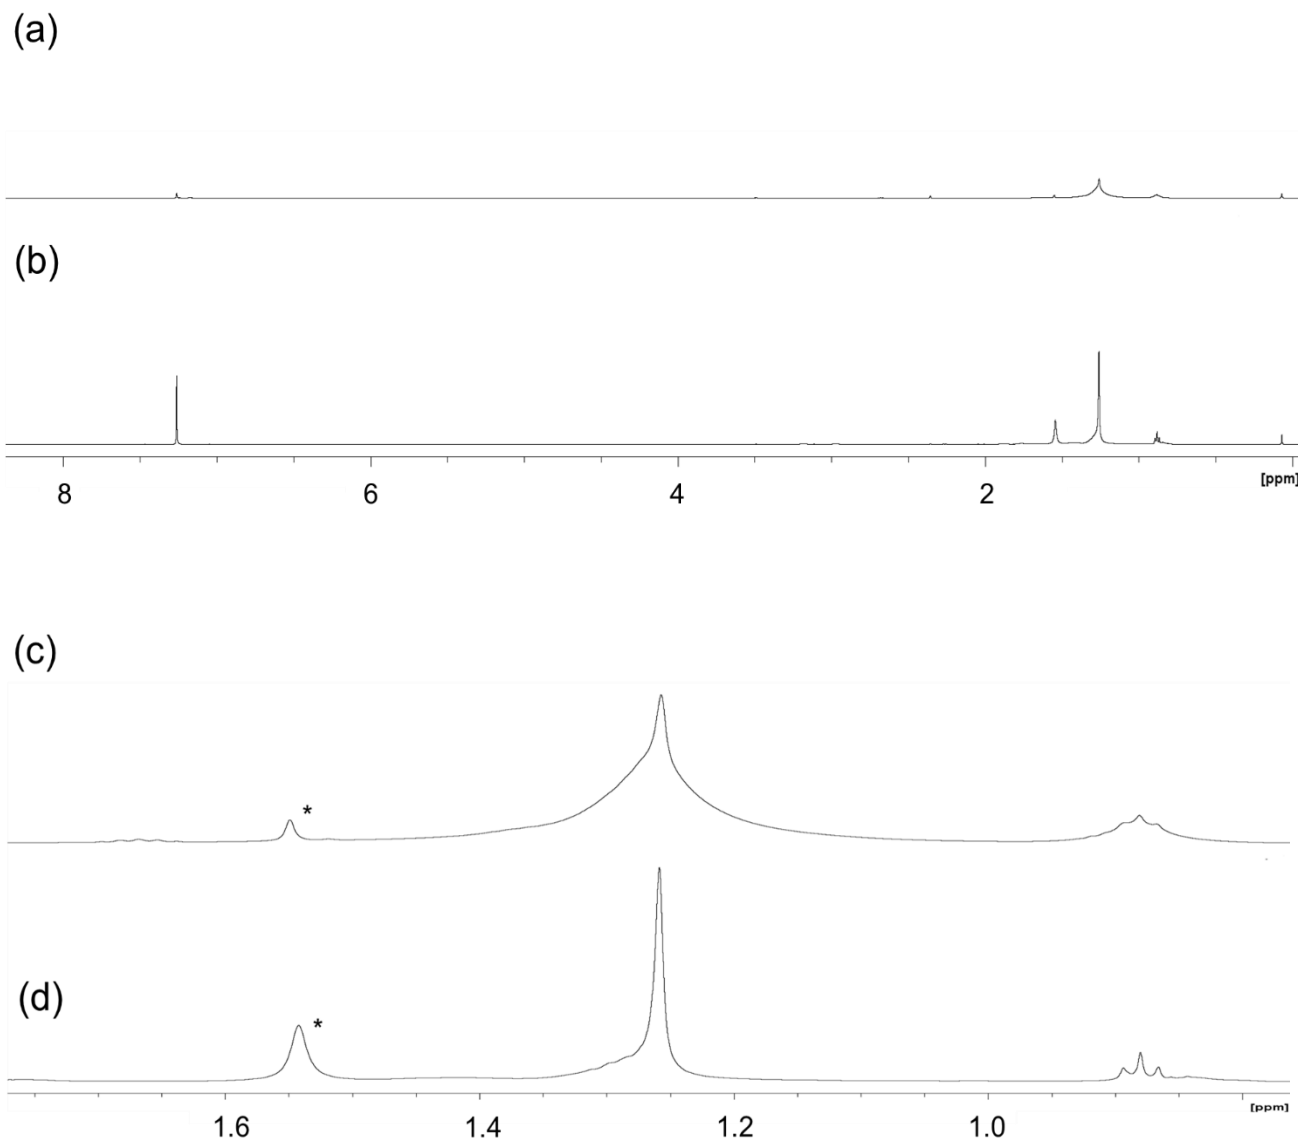

**Fig. S2.** <sup>1</sup>H NMR spectra of (a)/(c) BT@AuNP and (b)/(d) HDT@AuNP in CDCl<sub>3</sub>.  
\* indicates water (1.58 ppm).

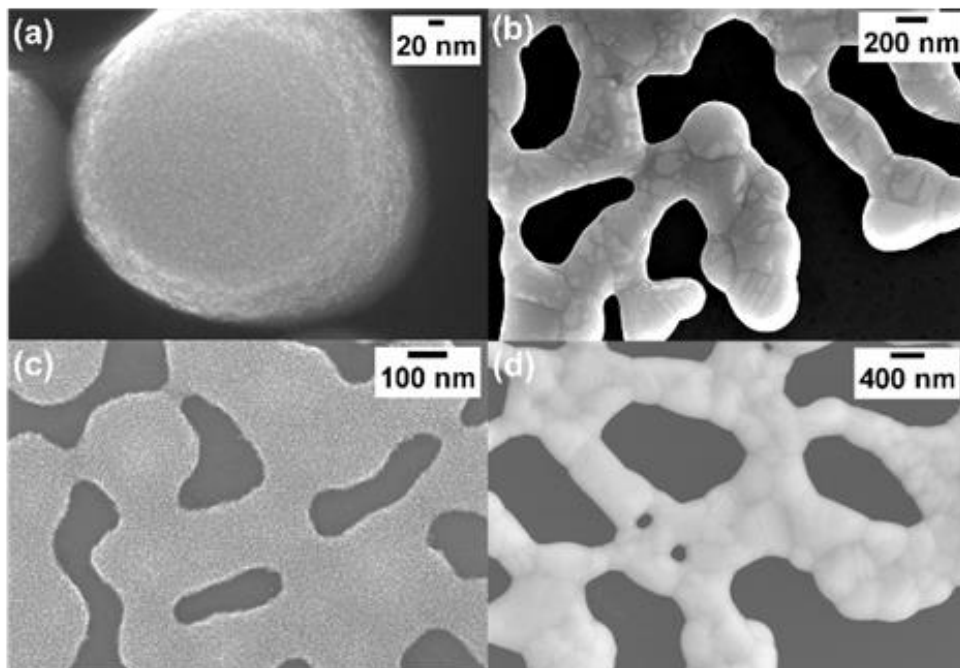

**Fig. S3.** SEM images of BT@AuNPs (a) and HDT@AuNPs (c) deposited using chloroform before heating and (b/d) after heating  $10\text{ }^{\circ}\text{C min}^{-1}$  in air to  $350\text{ }^{\circ}\text{C}$ .

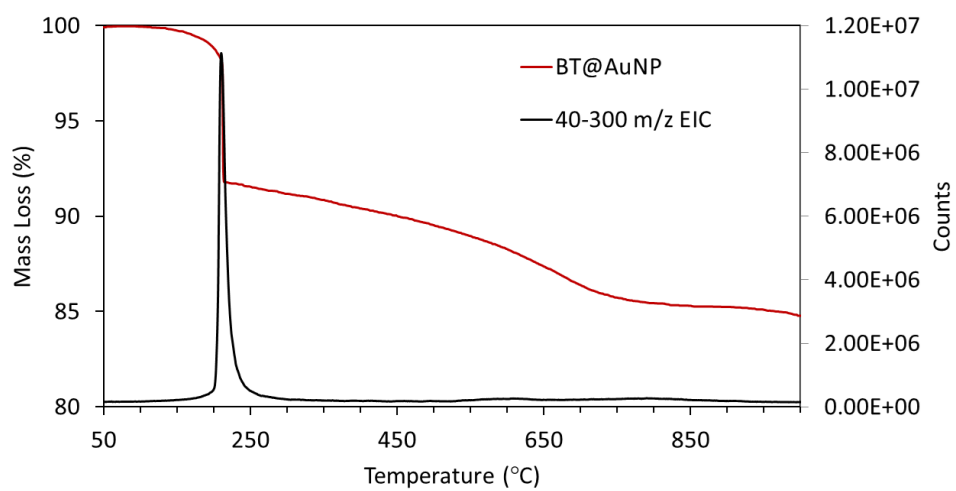

**Fig. S4.** TGA-MS data for BT@AuNP under a helium atmosphere.

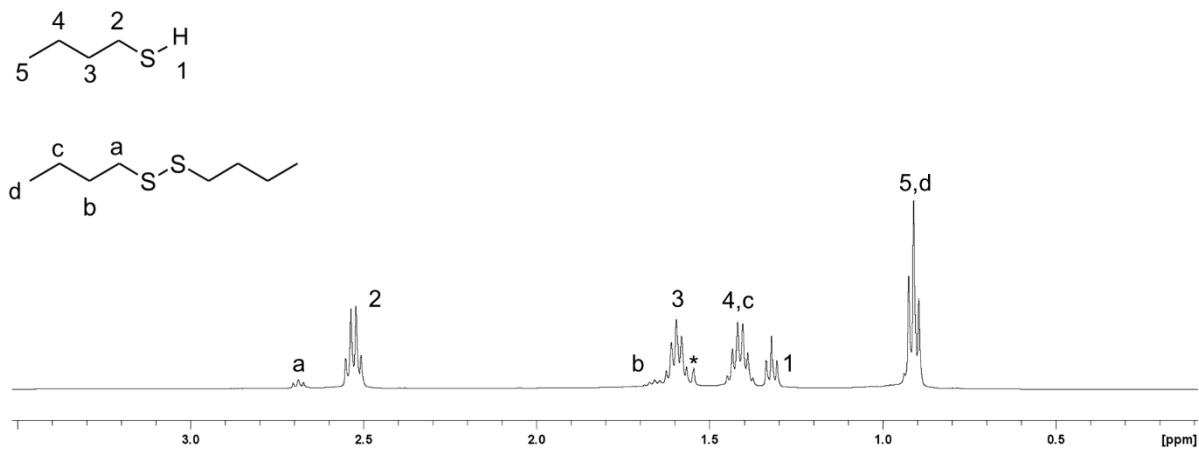

**Fig. S5.**  $^1\text{H}$  NMR spectra of 1-butanethiol spiked with dibutyl disulfide.

\* denotes water (1.58 ppm).

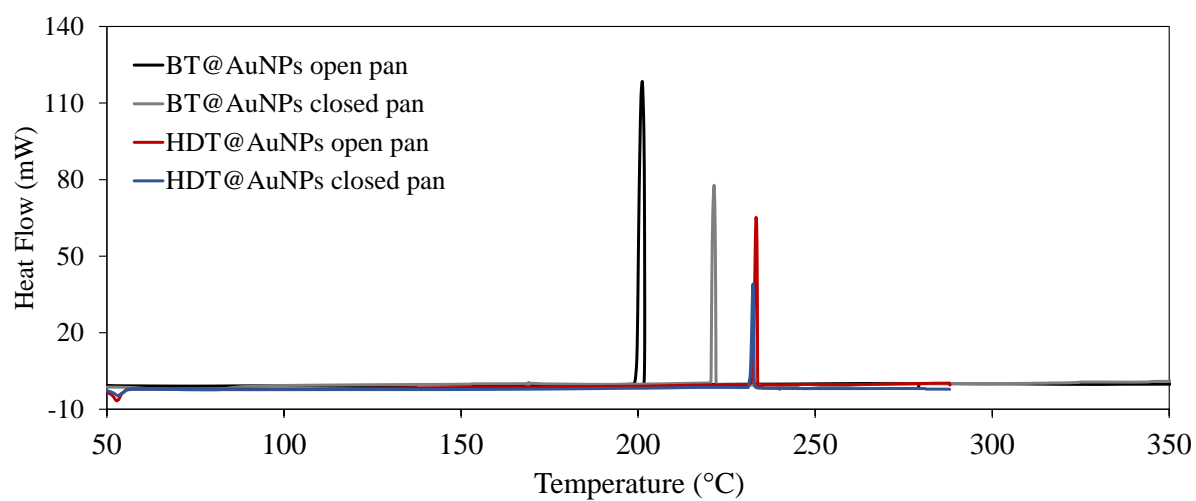

**Fig. S6.** Heat flow peaks (exothermic) under sealed and open environments for BT@AuNP and HDT@AuNP.

**Table S1.** Kruskal-Wallis test data comparing  $T_{SE}$  values of HDT@AuNPs sintered under different gaseous environments argon, hydrogen and air (gases), and a comparison of the gas  $T_{SE}$  data compared with high vacuum sintering data (atmospheres).

|             | $\chi^2$ | df | p     |
|-------------|----------|----|-------|
| Gases       | 0.651    | 3  | 0.885 |
| Atmospheres | 2.34     | 1  | 0.126 |

**Table S2.** Kruskal-Wallis test data comparing  $T_{SE}$  values of BT@AuNPs sintered under different gaseous environments argon, hydrogen and air (gases), and a comparison of the gas  $T_{SE}$  data compared with high vacuum sintering data (atmospheres).

|             | $\chi^2$ | df | p     |
|-------------|----------|----|-------|
| Gases       | 3.14     | 3  | 0.371 |
| Atmospheres | 10       | 1  | 0.002 |
